# Supplementary material for: Serum β2-microglobulin may be a viral biomarker by analyzing children with upper respiratory tract infections and exanthem subitum: a retrospective study
Source: PeerJ. 2021 Apr 6;9:e11109. doi: 10.7717/peerj.11109 (PMC8034339; doi:10.7717/peerj.11109)
Supplement: Supplemental Information 3 [file peerj-09-11109-s003.xlsx]

## Sheet: Sheet1
Number	sex	age (months)	Pathogen	Febrile convulsion	Eating less	Runny nose	Pharyngeal congestion	Swelling of tonsil	Mild dry cough	WBC(*1000)	N%	L%	CRP (mg/L)	fever	Peak temperature（℃）	Duration of fever (day)	β2-MG	NUN mmol/L	Cr umol/L
1	F	12	Adenovirus	no	yes	yes	yes	yes	no	5.45	29.6	55.8	14.5	no	/	0	3.01	2.87	30.6				2
2	M	12	Adenovirus	no	no	yes	yes	yes	no	7.8	74.9	15.6	97.58	no	/	0	2.02	3.97	42.5				2
3	F	9.6	Adenovirus	no	no	yes	yes	no	no	21.36	69.6	18.8	86.45	no	/	0	2.26	2.9	34.2				2
4	M	6.6	Adenovirus	no	yes	yes	yes	yes	yes	20.51	54.2	36.7	39.59	yes	39	1.5	3	1.6	23.1				2
5	M	12	Adenovirus	yes	no	no	yes	no	no	12.33	80.1	7.9	10.24	yes	39.4	2	2.33	3.55	32.1				2
6	M	10.8	Adenovirus	no	no	yes	yes	no	no	19.03	58.2	28.3	21.11	yes	39	2	2.52	2.37	13				2
7	M	19.2	Adenovirus	no	no	yes	yes	yes	no	9.33	45.5	39	61.8	yes	39.5	2.5	2.94	2.03	38.5				2
8	M	13.2	Adenovirus	no	no	yes	yes	yes	no	42.85	79.6	10.4	22.79	yes	39.5	2.5	4.28	2.2	35				2
9	F	18	Adenovirus	no	no	yes	yes	yes	no	18.88	42.7	46.7	29.83	yes	39	2.5	2.68	4.16	26				2
10	M	9.6	Adenovirus	no	no	yes	yes	no	no	20.39	62.1	29.5	36.45	yes	39	2.5	2.62	2.37	24				2
11	F	15.6	Adenovirus	yes	no	yes	yes	yes	no	18.38	73.3	20.4	38.73	yes	39	3	2.82	1.76	37				2
12	F	12	Adenovirus	yes	no	yes	yes	no	no	18.07	58.1	28.9	10.7	yes	39.2	3	2.41	3.04	28				2
13	M	22.8	Adenovirus	no	yes	yes	yes	yes	no	11.38	82.2	11.5	3.68	yes	39.5	3	2.36	4.68	30.2				2
14	F	12	Adenovirus	no	no	yes	yes	yes	no	14.77	66.9	17.4	11.52	yes	40	3	2.19	3.4	33				2
15	M	13.2	Adenovirus	no	no	yes	yes	yes	no	12.22	78.3	9.8	29.62	yes	39	3	2.91	3.07	48.6				2
16	F	12	Adenovirus	no	yes	no	yes	no	no	13.77	55	35.7	21	yes	39.3	3	3.23	3.75	36				2
17	F	10.8	Adenovirus	no	no	yes	yes	no	no	11.87	69.8	20.2	12.24	yes	39	3	2.17	2.11	28				2
18	M	10.8	Adenovirus	no	no	yes	yes	no	no	9.18	72.9	14.9	4.49	yes	39	3	2.77	3	31.7				2
19	F	10.8	Adenovirus	no	no	yes	yes	no	no	21.68	49.8	38.6	19.51	yes	39.4	3	3.17	3.32	28				2
20	F	14.4	Adenovirus	no	no	yes	yes	yes	no	10.82	69.1	20.9	53.89	yes	39	3.5	2.51	4.42	30.3				2
21	M	18	Adenovirus	no	no	yes	yes	yes	no	14.98	60.8	31.6	27.4	yes	39	3.5	2.48	3.44	16				2
22	M	14.4	Adenovirus	no	no	yes	yes	yes	yes	9.94	68.5	20.7	0.68	yes	40	4	2.32	4.89	28				2
23	F	24	Adenovirus	no	no	yes	yes	no	yes	22.76	86.2	6.9	14.78	yes	39.3	4	2.31	4.82	32				2
24	F	16.8	Adenovirus	no	no	no	yes	yes	no	25.18	70.9	16.4	69.22	yes	38	4	3.12	2.67	37.4				2
25	M	16.8	Adenovirus	no	no	no	yes	yes	no	12.57	61.8	23.7	35.9	yes	40.5	4	2.81	2.06	34.6				2
26	M	12	Adenovirus	no	no	yes	yes	yes	no	10.26	61.2	26.3	16.02	yes	39.9	4	2.46	2.72	25.7				2
27	M	12	Adenovirus	no	no	yes	yes	yes	no	13.52	74.5	11.7	38.46	yes	39.6	4	2.53	2.98	31				2
28	F	15.6	Adenovirus	no	no	yes	yes	yes	no	13.6	87.4	5.4	6.82	yes	39	4	2.2	4.88	39				2
29	F	12	Adenovirus	no	no	yes	yes	yes	no	5.01	41.3	45.6	46.18	yes	39.3	4	3.08	3.28	28.5				2
30	F	12	Adenovirus	no	no	no	yes	no	no	13.17	57.3	30.5	7.44	yes	39	4	3.05	3.73	44				2
31	F	12	Adenovirus	no	no	yes	yes	no	no	24.22	81.9	12.2	24.308	yes	40	4	2	3.43	32				2
32	F	12	Adenovirus	no	no	yes	yes	no	no	8.53	70.7	22.9	2.26	yes	39.5	4	2.9	4.15	33				2
33	F	22.8	Adenovirus	no	no	yes	yes	yes	yes	7.69	57.3	33.8	17.85	yes	39	4.5	2.72	3.44	41				2
34	M	14.4	Adenovirus	no	no	yes	yes	yes	no	6.12	69.4	19.3	10.48	yes	39	4.5	3.01	2.41	41					2
35	F	10.8	Adenovirus	no	yes	yes	yes	no	no	5.97	64.6	25.5	13.76	yes	39.5	4.5	3.11	2.97	36				2
36	M	9.6	Adenovirus	no	yes	yes	yes	no	no	24.87	75.1	14.1	62	yes	39	4.5	3.22	4.85	45				2
37	M	12	Adenovirus	yes	no	no	yes	no	no	18.08	50.4	37.1	14.97	yes	39.5	5	2.22	1.99	19				2
38	M	18	Adenovirus	no	no	yes	yes	yes	yes	13.2	61.1	30.5	75.25	yes	39	5	2.54	3.65	35				2
39	M	14.4	Adenovirus	no	no	yes	yes	yes	yes	6.81	37.3	48.8	36.26	yes	39	5	2.48	2.65	40				2
40	F	24	Adenovirus	no	no	yes	yes	yes	no	24.6	60.6	24.8	74.16	yes	40	5	2.86	3.16	27.1				2
41	M	21.6	Adenovirus	no	no	yes	yes	yes	no	26.46	75.6	17.8	32	yes	39.9	5	1.97	1.05	24				2
42	M	12	Adenovirus	no	no	no	yes	no	no	12.55	80.2	12.2	0.87	yes	39	5	2.29	5.35	37				2
43	F	8.4	Adenovirus	no	no	yes	yes	no	no	8.49	74.1	16.3	33.9	yes	39.3	5	2.48	2.47	35				2
44	M	12	Adenovirus	no	no	yes	yes	no	no	6.47	33.8	55.8	107.94	yes	39	5	2.07	3.45	33				2
45	M	12	Adenovirus	no	no	yes	yes	no	no	12.92	62.8	21.7	59.96	yes	40	5	2.92	2.06	30.1				2
46	F	12	Adenovirus	no	no	yes	yes	no	no	7.99	56	30.9	3.21	yes	39	5	2.61	3.08	25.7				2
47	M	19.2	Adenovirus	no	no	yes	yes	yes	yes	10.72	52	37.7	4.85	yes	39	5.5	3.77	2.5	39.9				2
48	M	12	Adenovirus	no	no	yes	yes	yes	no	12.65	70.7	20.9	3.61	yes	40	5.5	3.96	3.12	48.1				2
49	M	12	Adenovirus	no	no	yes	yes	no	no	3.29	59.3	29.9	1.49	yes	39.6	5.5	2.85	3.75	40				2
50	M	21.6	Adenovirus	no	no	no	yes	yes	no	17.99	89.8	3.3	42.22	yes	39.2	6	2.46	5.48	49				2
51	M	19.2	Adenovirus	no	no	yes	yes	yes	no	8.98	75	14.2	18.09	yes	39	6	2.49	3.71	57.1
52	M	18	Adenovirus	no	no	yes	yes	yes	no	14.02	62.8	25.7	18.2	yes	39	6	2.9	2.6	29.4
53	M	12	Adenovirus	no	no	yes	yes	yes	no	7.03	39.8	45.2	6.41	yes	39	6	3.29	2.86	24
54	M	24	Adenovirus	no	no	yes	yes	yes	no	5.89	71.5	16.3	10.37	yes	39	6	2.22	3.88	44
55	F	10.8	Adenovirus	no	no	no	yes	no	no	15.58	69.6	17.9	76.36	yes	40	6	2.55	2.82	45
56	F	12	Adenovirus	no	no	yes	yes	no	no	8.34	56.3	35	30.3	yes	39	6	3.59	3.26	29
57	F	19.2	Adenovirus	no	no	no	yes	yes	no	8.45	62.1	26	14.13	yes	39	6.5	3.28	2.91	47.6
58	M	12	Adenovirus	no	no	yes	yes	yes	no	9.73	77.2	13.4	33.65	yes	40	7	2.52	1.84	34
59	F	7.2	Escherichia coli	no	no	no	yes	no	no	18.81	70.3	19.9	37.43	yes	38.5	2	1.95	2.98	20.4
60	M	12	Escherichia coli	no	no	yes	yes	no	no	13.72	54.9	29.8	57.95	yes	39	8	2.07	2.89	29
61	F	14	Exanthem subitum	no	yes	no	no	no	no	4.99	31.3	53.5	0.49	yes	39	3	3.6	3.44	20
62	M	18	Exanthem subitum	yes	no	yes	yes	no	no	5.77	74.7	17.5	6.14	yes	39.5	2.5	3.74	4.76	30.4
63	F	13	Exanthem subitum	no	yes	no	no	no	no	7.37	19.3	71.9	2.3	yes	39.8	2.5	3.02	3.42	20.3
64	M	13	Exanthem subitum	no	yes	no	no	no	no	7.32	11.2	83.2	0.5	yes	39	3	3.3	3.6	21
65	F	9	Exanthem subitum	no	yes	no	no	no	no	5.64	54	30.9	3.13	yes	39.5	3	4.38	4.89	21
66	M	11	Exanthem subitum	no	no	no	no	no	no	6.42	10.3	83.3	0.49	yes	39.5	3	4.12	1.3	19.1
67	M	20	Exanthem subitum	no	no	no	no	no	no	6.74	11.9	79.1	1.21	yes	40	3	4.06	5.95	30.5
68	F	15	Exanthem subitum	no	no	no	no	no	no	8.08	56.8	31.8	0.49	yes	40	3	3.77	3.68	23.5
69	F	10	Exanthem subitum	yes	no	no	no	no	no	4.38	41.3	40.4	0.49	yes	38.7	3.4	4.33	4.89	28.7
70	M	16	Exanthem subitum	no	yes	no	no	no	no	4.81	44	46.4	2.67	yes	39.8	3.4	4.58	6.29	41.1
71	M	15	Exanthem subitum	no	no	yes	yes	no	yes	7.53	62.2	30	4.67	yes	40.4	3.5	4.72	5.47	33.1
72	M	11	Exanthem subitum	no	yes	no	no	no	no	3.41	51.3	33.4	15.52	yes	39.6	3.5	4.05	3.54	24
73	M	6	Exanthem subitum	no	yes	no	no	no	yes	5.66	45	40.3	1.85	yes	39	3.6	4.15	3.07	28
74	M	19	Exanthem subitum	no	no	yes	yes	yes	no	6.61	14.4	77.9	1.84	yes	39	3.7	4.31	2.82	24.5
75	F	14	Exanthem subitum	no	no	no	no	no	no	2.01	36.7	49.7	5.75	yes	39.5	3.7	4.27	3.77	25.6
76	F	12	Exanthem subitum	no	no	no	yes	yes	yes	4.98	62.2	23.5	0.49	yes	39.4	3.8	4.26	4.25	27.3
77	M	11	Exanthem subitum	no	yes	yes	yes	no	yes	11.02	39.1	40.3	12.55	yes	39.9	4	3.9	0.57	18
78	F	11	Exanthem subitum	no	yes	no	yes	no	no	5.56	22.2	69.6	19.99	yes	39.7	4	3.41	3.34	27
79	M	15	Exanthem subitum	no	yes	no	no	no	no	2.96	39.5	45.1	0.5	yes	39.9	4	5.53	6.51	38
80	F	12	Exanthem subitum	no	yes	no	no	no	no	2.71	54.9	26.2	1.68	yes	39	4	3.56	3.85	21
81	M	10	Exanthem subitum	no	no	no	no	no	no	6.13	27.9	62.6	0.62	yes	40.4	4	5.24	5.2	32.8
82	M	13	Exanthem subitum	no	no	no	no	no	no	3.15	46.1	43.8	1.56	yes	40.4	4	4.08	4.87	27.8
83	F	14	Exanthem subitum	no	no	no	no	no	no	4.97	59.1	25.8	0.49	yes	39.5	4	3.3	3.38	30.3
84	M	15	Exanthem subitum	yes	no	no	no	no	no	9.95	72.9	18.4	5.18	yes	39.8	4.2	4.23	3	23.1
85	F	14	Exanthem subitum	no	yes	no	no	no	no	3.77	53.6	28.1	0.49	yes	40.3	4.3	3.64	3.84	25.9
86	F	22	Exanthem subitum	no	no	no	no	no	no	6.43	36.5	46.2	0.49	yes	39.2	4.3	3.92	4.71	28.3
87	M	12	Exanthem subitum	no	yes	no	no	no	no	4.74	44.4	31.4	9.77	yes	39.2	4.3	3.73	4.54	22.8
88	F	11	Exanthem subitum	no	no	yes	no	no	no	2.32	47.9	27.9	9.49	yes	39.8	4.4	3.75	4.85	31
89	M	15	Exanthem subitum	no	no	no	no	no	no	4.03	39.8	49.6	8.32	yes	39.8	4.4	4.32	2.62	34
90	F	17	Exanthem subitum	yes	no	no	yes	yes	no	5.36	53.4	32.6	0.49	yes	40	4.5	2.52	3.64	25.2
91	M	9	Exanthem subitum	no	no	no	yes	no	no	10.73	60.3	30.1	56.37	yes	40.2	4.5	4.24	3.49	22.8
92	M	10	Exanthem subitum	no	yes	no	no	no	no	3.45	40.8	49.4	1.43	yes	39.8	4.5	5.51	2.83	27
93	F	11	Exanthem subitum	no	yes	no	no	no	no	3.46	50.2	35	0.49	yes	39.4	4.5	4.13	4.1	22.4
94	M	15	Exanthem subitum	no	no	no	no	no	no	5.58	57.1	36.6	0.49	yes	40	4.5	3.18	4.66	19.7
95	M	14	Exanthem subitum	no	no	no	no	no	no	6.9	65.3	13.6	0.5	yes	38.4	4.5	3.42	3.8	25
96	M	24	Exanthem subitum	no	no	no	no	no	no	4.26	61.3	27.7	16.19	yes	39	4.5	3.53	4.9	30.9
97	M	9	Exanthem subitum	no	yes	yes	yes	no	no	7.53	33.4	50.6	0.5	yes	39.4	4.6	4.65	3.45	30
98	M	15	Exanthem subitum	no	no	no	yes	no	no	3.11	19.5	/	9.25	yes	40	4.7	3.62	5.29	38
99	M	7	Exanthem subitum	no	no	no	no	no	no	1.53	62.7	24.8	9.15	yes	40	4.8	4.43	2.9	26
100	F	19	Exanthem subitum	no	no	no	yes	no	yes	4.94	56.5	31.6	3.28	yes	40	5	3.97	2.49	21.1
101	M	24	Exanthem subitum	no	no	yes	no	yes	no	4.04	48.4	38.6	1.48	yes	39	5	3.53	5.47	35.4
102	F	23	Exanthem subitum	no	yes	no	no	yes	no	2.27	44.1	40.5	0.55	yes	40	5	3.83	5.38	29
103	M	8	Exanthem subitum	no	yes	no	yes	no	no	12.59	55	28.6	14.97	yes	39.7	5	5.17	3.27	32.9
104	M	11	Exanthem subitum	no	yes	no	no	no	no	4.12	34.9	49.8	0.49	yes	39.2	5	5.33	2.67	32.8
105	M	14	Exanthem subitum	no	no	no	no	no	no	16.96	25.4	58.1	0.49	yes	40	5	4.78	4.4	25
106	M	8	Exanthem subitum	no	no	no	no	no	no	7.5	22.9	71.2	1.82	yes	39.5	5	5.54	3.77	29.6
107	M	10	Exanthem subitum	no	no	no	no	no	no	2.46	39.5	39.4	5.69	yes	38.7	5	5.45	1.74	29.8
108	F	9	Exanthem subitum	yes	no	no	yes	no	no	8.46	65.3	24.4	0.5	yes	38.8	5.2	4.49	2.33	26.4
109	F	7	Exanthem subitum	no	no	yes	no	no	no	5.18	49.8	39	13.18	yes	39.9	5.2	5.81	4.73	30
110	M	13	Exanthem subitum	no	no	no	yes	no	yes	9.71	51.6	29.2	103.94	yes	39.6	5.4	2.74	3.49	22
111	F	12	Exanthem subitum	no	yes	no	no	no	no	3.76	34.8	56.7	0.5	yes	39	5.9	6.07	5.28	29
112	F	12	Exanthem subitum	no	yes	no	no	no	no	6.76	49	34.1	1.56	yes	39	5.9	4.61	4.34	27
113	M	13	Exanthem subitum	no	no	no	yes	yes	no	3.74	36.2	44.1	0.5	yes	39.5	6	3.4	5.44	38
114	M	10	Exanthem subitum	yes	yes	no	yes	no	no	10.69	59.4	28.3	6.34	yes	39.8	6.2	3.62	3.82	24
115	M	24	Exanthem subitum	no	no	no	yes	no	yes	6.19	66.9	19.4	0.499	yes	39	6.7	2.26	3.59	25.9
116	F	7	Exanthem subitum	no	yes	no	no	no	no	4.8	37.2	49.2	3.3	yes	38.6	6.7	7.28	4.36	21.8
117	M	12	Exanthem subitum	yes	no	no	no	no	no	3.2	47.5	32	2.35	yes	39.1	6.8	4.28	4.62	29.6
118	M	8	Exanthem subitum	no	no	no	no	no	no	10.35	44.1	44.8	1.55	yes	39.6	7.5	4.59	1.48	20.4
119	F	12	Influenza A	no	no	yes	yes	yes	no	6.3	72.9	12.5	0.5	yes	39	1	2.78	4.93	43
120	M	6	Influenza A	no	yes	yes	yes	no	no	16.33	54.6	32.7	8.9	yes	39.5	1	2.86	3.65	24
121	F	12	Influenza A	no	yes	yes	yes	no	no	6.12	18.7	72.7	7.63	yes	38	1	2.92	2.83	34
122	M	16.8	Influenza A	yes	no	yes	yes	no	yes	6.83	76.5	15.6	11.71	yes	38.9	1.5	2.29	4.2	25
123	M	18	Influenza A	yes	no	no	yes	no	no	10.07	79.1	7.7	1	yes	39	1.5	2.79	5.45	30
124	F	14.4	Influenza A	yes	no	yes	yes	no	no	8.93	54.4	29.7	12.77	yes	39	1.5	2.63	5	29
125	F	12	Influenza A	no	no	yes	yes	yes	no	22.23	77.5	12.1	1.1	yes	39	1.5	4.01	3.75	32
126	F	15.6	Influenza A	no	yes	yes	yes	no	no	9.47	89.1	4.3	12.56	yes	37.9	1.5	2.01	4.44	40
127	M	10.8	Influenza A	no	yes	yes	yes	no	no	5.18	40.5	47.3	0.5	yes	38.5	1.5	2.62	3.31	38
128	M	8.4	Influenza A	no	no	yes	yes	no	no	5.43	77.2	12.2	1.39	yes	38.7	1.5	3.19	5.43	56
129	M	6	Influenza A	no	no	yes	yes	no	no	4.78	35	47	2.91	yes	38.5	1.5	6.07	2.57	32
130	M	12	Influenza A	yes	no	yes	yes	no	yes	8.53	81.5	8.9	41.77	yes	39.5	2	2.65	5.14	37
131	F	8.4	Influenza A	yes	yes	yes	yes	no	no	8.72	78.5	13.8	0.61	yes	39.4	2	2.94	3.9	30
132	M	16.8	Influenza A	yes	no	yes	yes	no	no	13.85	80.4	10.1	0.29	yes	39.3	2	3.19	9.15	33
133	M	10.8	Influenza A	yes	no	yes	yes	no	no	4.81	74.9	12.6	3.53	yes	38.5	2	2.41	4.54	46
134	F	10.8	Influenza A	no	no	yes	yes	yes	yes	12.52	81.5	9.2	7.02	yes	38.5	2	2.46	2.58	25
135	M	12	Influenza A	no	no	yes	yes	yes	yes	13.25	85.1	9.1	0.58	yes	39.2	2	2.28	4.39	29
136	F	7.2	Influenza A	no	yes	yes	yes	yes	no	19	78.5	8.4	30.15	yes	39	2	3	3.16	41
137	M	12	Influenza A	no	yes	yes	yes	yes	no	4.73	86.5	6.7	1.16	yes	39.9	2	2.81	4.93	48
138	F	24	Influenza A	no	no	no	yes	no	no	9.06	87.4	4.7	3.22	yes	40	2	2.82	4.26	43
139	F	9.6	Influenza A	no	no	no	yes	no	no	13.56	87.3	6.1	14.42	yes	40.1	2	3.06	5.01	40
140	M	8.4	Influenza A	no	yes	yes	yes	no	no	10.51	46.7	39.6	17.89	yes	39.5	2	3.72	4.65	32
141	M	8.4	Influenza A	no	no	yes	yes	no	no	5.85	81.2	10.6	0.45	yes	39	2	2.7	3.45	30
142	M	12	Influenza A	no	no	yes	yes	no	no	10.23	90.6	6.5	2.4	yes	38.6	2	2	3.86	33
143	M	12	Influenza A	no	no	yes	yes	no	no	6.31	80.5	14.1	0.59	yes	40	2	3.32	5.04	32
144	M	13.2	Influenza A	yes	no	yes	yes	no	no	7.7	64.2	23.4	0.45	yes	38.5	2.5	3.09	3.84	38
145	F	21.6	Influenza A	yes	no	yes	yes	no	no	9.68	81.8	6.1	0.49	yes	38.5	2.5	2.38	5.19	29
146	M	19.2	Influenza A	yes	no	yes	yes	no	no	6.95	74.1	11.4	9.3	yes	39.4	2.5	3.39	3.97	28
147	M	14.4	Influenza A	yes	no	yes	yes	no	no	7.66	63.5	22.2	0.5	yes	39.2	2.5	3.13	6.24	27
148	M	12	Influenza A	yes	no	yes	yes	no	no	9.46	88.8	4	0.29	yes	38.6	2.5	2.74	4.78	30
149	M	9.6	Influenza A	no	yes	yes	yes	yes	no	3.79	78.9	10.8	4.94	yes	39.3	2.5	2.55	3.46	46
150	M	9.6	Influenza A	no	no	yes	yes	yes	no	8.93	32.6	58.6	5.32	yes	39.7	2.5	4.5	6.04	40
151	M	15.6	Influenza A	no	no	yes	yes	yes	no	11.95	79.5	11.8	0.5	yes	39.9	2.5	3.36	4.09	44
152	M	8.4	Influenza A	no	yes	yes	yes	no	no	4.01	73	13	9.2	yes	40	2.5	4.25	4.54	36
153	M	12	Influenza A	no	no	yes	yes	no	no	8.19	83.4	8.2	1.55	yes	38.5	2.5	2.82	2.45	41
154	M	12	Influenza A	no	no	yes	yes	yes	no	3.32	60.3	28.1	0.45	yes	38.8	2.54	3.19	4.93	49
155	F	12	Influenza A	yes	no	yes	yes	no	no	5.94	47.2	34.9	1.85	yes	39	3	4.78	2.74	28
156	F	12	Influenza A	yes	no	yes	yes	no	no	7.75	89.1	7.8	0.49	yes	39	3	3.15	3.19	29
157	M	24	Influenza A	yes	no	yes	yes	no	no	5.76	87.8	5.2	0.65	yes	39.4	3	3.28	6.75	48
158	F	6	Influenza A	no	yes	no	yes	yes	no	9.44	82.6	9.9	6.25	yes	40	3	3.49	3.94	30
159	F	12	Influenza A	no	no	yes	yes	yes	no	6.34	81.2	9	2.78	yes	39.9	3	3.38	3.45	45
160	F	12	Influenza A	no	no	yes	yes	yes	no	6.45	59.1	30.4	1.19	yes	39.5	3	3.08	3.66	33
161	F	14.4	Influenza A	no	no	yes	yes	yes	no	7.31	73.4	17.7	11.57	yes	38.5	3	2.47	2.33	49
162	F	12	Influenza A	no	no	yes	yes	yes	no	5.11	68.9	17.7	11.25	yes	39.4	3	3.93	3.57	34
163	F	15.6	Influenza A	no	yes	yes	yes	no	no	3.93	9.6	81.2	0.45	yes	40	3	2.83	2.93	26
164	M	12	Influenza A	no	yes	yes	yes	no	no	5.8	81.8	5.5	0.5	yes	38.3	3	2.1	3.33	43
165	M	18	Influenza A	no	no	yes	yes	no	no	7.14	72.7	17	7.59	yes	39.4	3	2.3	4.14	42
166	F	10.8	Influenza A	no	no	no	yes	no	no	6.15	70.8	16.9	0.99	yes	39.2	3.5	2.95	3.11	57
167	F	13.2	Influenza A	no	yes	yes	yes	no	no	10.21	89.3	4.9	6.19	yes	39.1	3.5	2.76	3.85	45
168	M	6.48	Influenza A	no	no	yes	yes	no	no	22.1	13.7	78.4	0.45	yes	38.5	3.5	1.53	4.33	18
169	F	15.6	Influenza A	no	no	no	yes	yes	no	7.44	49.5	38.5	0.45	yes	40.2	4	6.11	5.23	38
170	F	13.2	Influenza A	no	no	yes	yes	yes	no	9.08	72.3	18.2	0.48	yes	41	4	2.88	3.53	23
171	F	12	Influenza A	no	yes	yes	yes	no	no	7.81	56.4	33.9	2.53	yes	39.5	4	2.72	4	33
172	M	8.4	Influenza A	no	no	yes	yes	no	no	9.66	84.3	8.1	19.05	yes	38.5	4	2.84	5.01	46
173	F	18	Influenza A	no	no	yes	yes	no	no	14.15	52.9	38.1	56.79	yes	39.5	4	1.95	2.58	27
174	M	24	Influenza A	no	no	yes	yes	no	no	5.37	63.2	25.8	0.45	yes	38.5	4.5	2.58	3.08	35
175	M	6	Influenza A	no	no	no	yes	no	no	11.47	76.4	19.5	39.25	yes	40.5	5	3.09	3.19	22
176	M	14.4	Influenza A	no	no	yes	yes	no	no	3.96	38.3	45.5	0.56	yes	39.1	5	2.3	3.04	23
177	M	6	Influenza A	no	yes	yes	yes	no	no	6.2	45.5	39.2	0.29	yes	39	7	4.05	1.35	27
178	F	8.4	Influenza A	no	no	yes	yes	no	no	4.27	67.5	19.4	0.45	yes	38.9	8	2.73	3.15	51
179	M	12	Influenza B	no	yes	yes	yes	yes	no	3.69	23.9	66.9	0.49	no	/	0	2.56	2.32	31.4
180	M	14.4	Influenza B	no	no	yes	yes	yes	no	2.93	83	13.8	0.5	no	/	0	2.63	3.94	41.2
181	F	19.2	Influenza B	no	no	yes	yes	yes	no	10.79	78.9	16.5	0.5	no	/	0	1.97	3.99	29.2
182	F	10.8	Influenza B	no	yes	yes	yes	no	no	4.66	24.9	68	0.49	no	/	0	2.51	3.54	36.6
183	F	12	Influenza B	no	yes	yes	yes	no	no	7.39	51.8	40.6	19.79	no	/	0	2.54	4.1	21.8
184	F	8.4	Influenza B	yes	yes	yes	yes	no	no	9.64	81.8	15.6	0.5	yes	38.5	1.5	2.38	3.73	39
185	M	8.4	Influenza B	yes	yes	yes	yes	no	no	5.7	34.2	53.2	0.5	yes	39	1.5	3.68	3.83	39.1
186	F	13.2	Influenza B	yes	no	yes	yes	no	no	4.03	24.1	64.5	0.49	yes	39	1.5	3.03	3.68	36.7
187	M	21.6	Influenza B	no	yes	yes	yes	no	no	12.47	69.2	19	3.6	yes	39.1	1.5	3.39	5.2	35
188	M	8.4	Influenza B	yes	no	yes	yes	no	no	9.78	84.5	6.3	0.49	yes	38.5	2	2.42	4.49	37.7
189	F	10.8	Influenza B	no	yes	yes	yes	yes	no	4.67	8.4	82.9	0.66	yes	38.5	2	2.66	2.91	27.7
190	F	24	Influenza B	no	no	yes	yes	no	no	2.64	39.7	48.4	0.73	yes	38.8	2	3.8	3.98	58
191	F	15.6	Influenza B	no	no	yes	yes	no	no	5.3	28.1	65.7	0.58	yes	39.2	2	2.51	2.59	43.7
192	F	15.6	Influenza B	no	no	yes	yes	no	no	11.62	52.5	37.3	0.5	yes	39.4	2	3.01	4.39	32
193	M	10.8	Influenza B	yes	no	yes	yes	no	no	11.22	65.7	12.7	0.49	yes	39	2.5	3.11	4.62	31
194	M	24	Influenza B	no	no	no	yes	yes	no	3.04	44.1	39.6	0.76	yes	39	3	2.72	4.82	49.7
195	F	19.2	Influenza B	no	yes	yes	yes	yes	no	2.31	16	72.2	0.57	yes	38.6	3	2.82	3.78	34
196	F	9.6	Influenza B	no	yes	yes	yes	yes	no	4.42	20.6	72.4	0.49	yes	38.8	3	2.21	2.96	37.8
197	M	24	Influenza B	no	yes	yes	yes	yes	no	4.11	23	61.6	0.49	yes	39.6	3	2.98	5.4	43.3
198	F	15.6	Influenza B	no	no	yes	yes	yes	no	3.27	8.6	86.2	0.49	yes	38.5	3	2.46	3.7	40.2
199	F	12	Influenza B	no	yes	yes	yes	no	no	6.01	67.2	21.8	1.79	yes	39	3	2.93	2.6	29
200	F	12	Influenza B	no	yes	yes	yes	no	no	9.38	65.1	23.4	3.44	yes	39	3	2.55	3.55	40
201	M	18	Influenza B	no	no	yes	yes	no	no	2.04	72.5	21.1	0.49	yes	39.8	3	3.48	6.08	59
202	M	10.8	Influenza B	no	no	yes	yes	no	no	3.81	49.8	32.6	0.5	yes	39.4	3	3.49	4.6	47
203	M	12	Influenza B	no	no	yes	yes	no	no	2.54	72.4	20.3	0.5	yes	39	3	3.67	3.73	41
204	M	21.6	Influenza B	no	no	no	yes	yes	no	11.12	73.2	19.7	91.93	yes	39	3.5	3.34	4.12	38
205	M	20.4	Influenza B	no	no	yes	yes	yes	no	2.86	63.8	22.9	0.49	yes	38.9	3.5	2.93	3.26	40
206	M	12	Influenza B	no	no	yes	yes	no	no	6.77	67.2	21.5	4.59	yes	40	3.5	2.73	4.4	31
207	M	8.4	Influenza B	no	no	yes	yes	no	no	3.09	46	43.2	4.26	yes	39	3.5	2.64	3.26	36
208	M	20.4	Influenza B	yes	no	yes	yes	no	no	5.46	77.9	15.3	0.5	yes	38.7	4	3.49	4.12	40
209	M	9.6	Influenza B	no	no	yes	yes	yes	yes	4.38	54.6	33.3	10.19	yes	40.5	4	3.07	3.14	45
210	M	18	Influenza B	no	no	yes	yes	no	yes	4.93	39.5	47.8	3.26	yes	38.5	5	3.47	5.34	48
211	M	12	Influenza B	no	yes	yes	yes	no	no	2.81	53	31.5	3.78	yes	39	5	2.85	6.34	34
212	F	9.6	Influenza B	no	no	yes	yes	no	no	3.42	38.6	54.2	0.72	yes	39.5	5	2.92	3.18	32
213	F	12	Influenza B	no	no	yes	yes	no	no	2.53	32.9	56.7	0.5	yes	39.8	5.5	2.35	3.65	31
214	M	19.2	Influenza B	no	no	yes	yes	yes	no	4.12	55.8	33.5	4.79	yes	39.4	6	3.31	3.36	29
215	M	18	Influenza B	no	no	yes	yes	no	no	2.85	21.7	65.1	1.23	yes	39	7	2.93	4.17	31
216	F	8.4	Parainfluenza virus	no	yes	yes	yes	no	no	13.45	50.4	40.6	2	no	/	0	2.38	5.04	34
217	F	10.8	Parainfluenza virus	no	yes	yes	yes	no	yes	18	80.9	12.6	7.83	yes	39.7	1	3	2.23	32
218	F	12	Parainfluenza virus	no	yes	yes	yes	yes	yes	10	77.4	17.8	4.93	yes	39.1	1.5	2.93	3.74	22
219	F	12	Parainfluenza virus	no	no	yes	yes	yes	yes	14.5	51.5	35.8	6.34	yes	39	1.5	4.1	2.1	23
220	M	14.4	Parainfluenza virus	yes	no	no	yes	no	no	14.39	90.5	4.2	8.31	yes	39	2	3.27	4.13	30
221	M	8.4	Parainfluenza virus	no	no	yes	yes	yes	yes	21.07	45.8	41.7	0.56	yes	38	2	3.85	3.24	24
222	F	9.6	Parainfluenza virus	no	no	yes	yes	no	yes	12.51	14.8	73.4	0.5	yes	38.5	2	2.81	3.42	24
223	M	12	Parainfluenza virus	no	no	yes	yes	no	no	17.92	50.4	43.6	0.53	yes	39.5	2	3.98	2.83	29
224	F	22.8	Parainfluenza virus	no	no	yes	yes	no	no	9.91	79.5	12.3	0.49	yes	39	2	3.18	2.93	31
225	M	9.6	Parainfluenza virus	yes	yes	yes	yes	no	no	4.26	73.5	15.2	2.66	yes	39	2.1	3.11	2.98	27
226	F	8.4	Parainfluenza virus	no	yes	yes	yes	yes	yes	7.32	66.7	23.8	3.5	yes	39.2	2.5	2.27	1.94	22
227	F	14.4	Parainfluenza virus	no	no	yes	yes	yes	yes	17.73	71.8	20.6	10.73	yes	39	2.5	2.8	2.72	32.8
228	F	10.8	Parainfluenza virus	no	no	yes	yes	no	no	9.26	64	16.7	2.8	yes	40	2.5	3.5	3.72	19
229	M	9.6	Parainfluenza virus	yes	yes	yes	yes	no	yes	5.11	45	40.4	15.24	yes	38.5	3	2.47	6.35	44
230	F	8.4	Parainfluenza virus	no	no	yes	yes	no	yes	7.91	13.5	75.9	0.5	yes	39.2	3	2.83	4.14	30
231	M	18	Parainfluenza virus	no	no	yes	yes	no	yes	7.83	25.3	62.5	0.49	yes	39	3	3.38	3.17	19
232	M	12	Parainfluenza virus	no	no	no	yes	no	no	4.72	11.9	78.5	0.49	yes	39	3.5	3.01	3.17	30
233	M	12	Parainfluenza virus	yes	no	yes	yes	no	no	9.89	46	32.1	0.75	yes	39.6	4	3.13	3.37	19
234	M	12	Parainfluenza virus	no	no	yes	yes	no	yes	6.14	81.4	15.8	2.69	yes	38.3	4	2.24	2.74	29
235	M	13.2	Parainfluenza virus	no	no	yes	yes	no	no	13.22	40.4	47.9	4.01	yes	40	4	3.42	4.04	22
236	F	24	Parainfluenza virus	no	no	yes	yes	no	no	8.04	41.5	44.7	1.08	yes	39	4	2.75	3.87	28
237	F	12	Parainfluenza virus	no	no	yes	yes	no	no	8.74	62	28.7	0.5	yes	38.5	4	1.73	2.17	17
238	M	12	Parainfluenza virus	no	no	yes	yes	no	yes	7.79	51.4	43.8	0.4	yes	39.2	4.5	4.33	4.27	31
239	M	12	Parainfluenza virus	no	no	yes	yes	no	no	6.15	48.9	35.4	4.16	yes	40	4.5	2.71	3.84	36
240	M	10.8	Parainfluenza virus	no	no	yes	yes	no	yes	6.3	28.6	60.1	1.3	yes	39	5	2.81	5	30
241	M	12	Parainfluenza virus	no	no	no	yes	no	no	13	45.5	33.7	41.9	yes	39	6.5	1.66	2.68	29
242	M	19.2	Parainfluenza virus	no	no	yes	yes	no	no	6.99	24.5	64.9	0.5	yes	39	7	2.18	3.73	41
243	F	9.6	Parainfluenza virus	no	no	yes	yes	no	yes	12.44	40.8	45.4	0.45	yes	39.5	9	4.77	3.88	23.6
244	M	12	Respiratory syncytial virus	yes	no	yes	yes	no	no	11.16	70.1	21.5	0.5	yes	39	1	2.59	3.37	26
245	M	18	Respiratory syncytial virus	yes	no	yes	yes	no	no	7.23	87.8	6.1	1.4	yes	39.7	2	2.74	3.17	37
246	F	19	Respiratory syncytial virus	no	no	yes	yes	no	no	7.08	80.6	15.7	7.1	yes	39.5	2	2.78	3.87	25
247	F	12	Respiratory syncytial virus	no	no	yes	yes	no	no	7.03	29.8	53.6	0.95	yes	39.2	2.5	3.09	2.03	24
248	M	14	Respiratory syncytial virus	no	no	yes	yes	yes	no	11.8	19	71.9	0.3	yes	40	3	2.26	3.09	20
249	M	14	Respiratory syncytial virus	no	yes	yes	yes	no	no	20.76	38.3	52.3	0.29	yes	39.2	3	2.99	4.89	25
250	F	16.8	Respiratory syncytial virus	no	no	yes	yes	no	no	5.74	71.8	21.1	8.84	yes	40.5	3	3.53	3.97	37
251	F	18	Respiratory syncytial virus	no	no	yes	yes	no	no	7.49	19.1	73.7	1.32	yes	39	3	3.26	2.17	23
252	M	12	Respiratory syncytial virus	no	yes	yes	yes	yes	yes	11.26	35.2	53.2	0.51	yes	39.5	4	3.74	3.26	27
253	F	12	Respiratory syncytial virus	no	yes	yes	yes	yes	no	14.48	24.8	64.7	0.3	yes	39	4	3.11	5.31	27
254	F	13	Respiratory syncytial virus	no	no	yes	yes	no	no	7.19	28.9	56.7	0.29	yes	39.8	4	3.09	1.6	27
255	M	13	Respiratory syncytial virus	no	no	yes	yes	no	no	6.34	41.8	47.5	4.95	yes	39	5	3.61	3.3	31
256	M	13	Respiratory syncytial virus	no	no	yes	yes	no	no	8.31	39.7	48.4	0.29	yes	38.5	5	1.71	2.04	14
257	M	6	Respiratory syncytial virus	no	no	yes	yes	no	no	11.99	24.2	64.6	13.86	yes	39	6	2.6	3.35	26
258	F	14.4	Staphylococcus haemolyticus	no	yes	yes	yes	no	no	23.23	30.2	59.6	14.89	yes	38.5	1.5	2.25	2.43	22
259	M	6	Staphylococcus haemolyticus	no	yes	yes	yes	no	no	22.35	54.5	33.1	146	yes	38.5	1.5	1.66	3.52	19
260	F	18	Staphylococcus haemolyticus	no	no	yes	yes	no	no	18.45	68.2	23.2	21.56	yes	41	2.54	1.64	3.47	34
261	F	21.6	Staphylococcus haemolyticus	no	no	no	yes	yes	yes	19.96	72.5	11.6	96.7	yes	39.5	3	2.39	4.83	34
262	M	14.4	Staphylococcus haemolyticus	no	no	no	yes	no	no	28.12	82.6	8.7	36.23	yes	39	3	2.12	3.56	31
263	M	22	Staphylococcus haemolyticus	no	no	no	yes	no	no	5.38	56.7	27.4	16.41	yes	39	4	1.94	3	24
264	M	14.4	Staphylococcus haemolyticus	no	yes	yes	yes	no	no	12.25	33	60.5	0.5	yes	38.5	6.5	1.24	3.02	31
265	F	12	Streptococcus hemolyticus	no	no	no	yes	yes	no	4.36	26.1	68.1	2.46	no	/	0	2.19	2.28	20
266	M	19.2	Streptococcus hemolyticus	no	no	yes	yes	yes	no	7.75	28.6	59.5	1.24	no	/	0	1.85	1.35	24
267	M	10	Streptococcus hemolyticus	yes	no	yes	yes	no	no	15.72	65.3	23.4	10.47	yes	39.2	1	1.49	4.5	30
268	M	15.6	Streptococcus hemolyticus	no	no	yes	yes	yes	no	7.11	28	53.2	1.67	yes	39	1	2.8	3.06	21.8
269	F	20	Streptococcus hemolyticus	no	no	no	yes	yes	no	12.71	38.5	49.5	53.05	yes	38.7	1.5	2.07	3.08	33
270	M	18	Streptococcus hemolyticus	no	no	no	yes	yes	no	44.96	86.5	7.8	17.03	yes	38.5	1.5	1.73	3.21	36
271	F	13	Streptococcus hemolyticus	no	no	yes	yes	yes	no	23.91	74	17.8	31.81	yes	38.9	1.5	2.06	4.51	26
272	M	12	Streptococcus hemolyticus	no	no	yes	yes	yes	no	7.41	22.2	66.3	0.5	yes	39	1.5	2.68	3.03	23
273	M	12	Streptococcus hemolyticus	no	yes	yes	yes	no	no	30.22	81.3	8.3	0.5	yes	40	1.5	1.57	6.86	35
274	F	10	Streptococcus hemolyticus	yes	yes	yes	yes	no	no	14.06	80	10.4	10.02	yes	37.9	2	2.28	4.15	37
275	M	13	Streptococcus hemolyticus	no	no	yes	yes	yes	no	14.31	43.6	40.2	166.16	yes	39.5	2.5	1.6	5.17	16
276	F	10.8	Streptococcus hemolyticus	no	no	no	yes	yes	no	7.85	25.6	62.8	0.95	yes	38	3	2.47	2.62	12
277	M	14.4	Streptococcus hemolyticus	no	no	yes	yes	yes	no	14.37	37.8	52	52.69	yes	39.2	3	1.27	4.31	20
278	F	12	Streptococcus hemolyticus	no	yes	yes	yes	yes	no	13.55	75.7	11.1	10.7	yes	39	3.5	1.07	3.99	36.4
279	M	22	Streptococcus hemolyticus	no	no	yes	yes	yes	no	16.62	75.6	15.4	72.69	yes	39.2	4	1.62	3.86	23
280	F	24	Streptococcus hemolyticus	no	no	yes	yes	yes	no	10.9	44.7	41.3	10.87	yes	39.5	5.5	2.63	2.98	28
281	M	20.4	Streptococcus hemolyticus	no	no	no	yes	yes	no	12.71	37.6	49.2	61.95	yes	38.5	6.5	1.52	2.27	18
282	F	10	Streptococcus hemolyticus	no	no	yes	yes	yes	no	4.93	6.1	80.2	0.5	yes	39.5	6.5	2.74	3.4	26
283	F	12	Streptococcus hemolyticus	no	no	yes	yes	yes	no	17.18	68.2	21.6	17.34	yes	39.2	7.5	1.53	1.58	26
284	F	12	Streptococcus hemolyticus	no	no	yes	yes	yes	no	8.79	31.2	58.7	4.8	yes	40	8	2.52	3.41	32
285	M	9	Streptococcus hemolyticus	no	no	yes	yes	yes	no	15.1	50.5	36.3	42	yes	39.5	8	1.74	2.94	23
286	M	10	Streptococcus hemolyticus	no	no	no	yes	yes	no	24.8	55.3	34.7	18.01	yes	39.4	9	2.47	3.87	19.1
287	F	20	Streptococcus pneumoniae	no	yes	yes	yes	yes	no	33.07	84.8	5.8	1.08	yes	38.5	1.5	1.18	4.56	28
288	F	12	Streptococcus pneumoniae	no	yes	yes	yes	yes	no	37.31	89.4	4.8	21.52	yes	38.9	1.5	1.22	4.17	30
289	M	18	Streptococcus pneumoniae	no	no	no	yes	no	no	44.96	86.5	7.8	17.03	yes	38.5	1.5	1.73	3.16	46
290	M	24	Streptococcus pneumoniae	yes	no	yes	yes	no	no	19.42	77.3	17.8	0.49	yes	39	2.5	2.03	3.05	27.5
291	M	10.8	Streptococcus pneumoniae	yes	yes	no	yes	no	yes	16.62	75.6	15.4	72.69	yes	39.2	4	1.62	3.86	23
